# Supplementary material for: A novel defined risk signature based on pyroptosis-related genes can predict the prognosis of prostate cancer
Source: BMC Med Genomics. 2022 Feb 8;15:24. doi: 10.1186/s12920-022-01172-5 (PMC8822680; doi:10.1186/s12920-022-01172-5)
Supplement: Supplementary file 9 — Additional file 9: Table S3. Two different clusters were identified based on the expression levels of 52 PRGs. [file 12920_2022_1172_MOESM9_ESM.csv]

ID	Cluster
TCGA-VP-AA1N	C1
TCGA-XK-AAIW	C1
TCGA-ZG-A9L5	C1
TCGA-G9-7522	C2
TCGA-J4-A67N	C1
TCGA-HC-A6AL	C1
TCGA-EJ-8469	C1
TCGA-EJ-A46D	C2
TCGA-G9-6367	C2
TCGA-VP-A87E	C2
TCGA-HC-A4ZV	C1
TCGA-G9-6373	C1
TCGA-G9-6370	C2
TCGA-KK-A7AP	C1
TCGA-YL-A8HL	C1
TCGA-EJ-5518	C1
TCGA-HC-A632	C1
TCGA-EJ-5532	C1
TCGA-CH-5791	C2
TCGA-V1-A9OT	C1
TCGA-CH-5740	C1
TCGA-EJ-A8FP	C2
TCGA-V1-A8MK	C2
TCGA-EJ-7331	C2
TCGA-G9-6377	C1
TCGA-EJ-5525	C1
TCGA-CH-5751	C1
TCGA-CH-5753	C1
TCGA-EJ-A8FS	C1
TCGA-HC-7080	C1
TCGA-J9-A52E	C1
TCGA-HC-A9TE	C1
TCGA-X4-A8KS	C2
TCGA-CH-5788	C1
TCGA-G9-7510	C2
TCGA-TP-A8TT	C1
TCGA-HC-8256	C1
TCGA-VP-A876	C1
TCGA-YL-A8S8	C1
TCGA-VP-A87H	C1
TCGA-2A-A8VL	C1
TCGA-KK-A8I6	C2
TCGA-M7-A722	C1
TCGA-2A-A8VV	C1
TCGA-G9-6371	C1
TCGA-J4-A67K	C1
TCGA-EJ-7125	C1
TCGA-V1-A9OY	C2
TCGA-EJ-5521	C2
TCGA-EJ-5516	C2
TCGA-CH-5738	C2
TCGA-G9-7519	C1
TCGA-HC-7213	C1
TCGA-EJ-5505	C2
TCGA-HC-7233	C2
TCGA-CH-5750	C1
TCGA-KK-A8IG	C1
TCGA-VP-A87B	C1
TCGA-G9-6384	C2
TCGA-EJ-8474	C1
TCGA-HC-A6AQ	C2
TCGA-XJ-A9DI	C2
TCGA-J4-A67O	C1
TCGA-KC-A7F5	C1
TCGA-J4-A6M7	C1
TCGA-G9-6339	C2
TCGA-XK-AAJU	C2
TCGA-EJ-5515	C2
TCGA-J4-A6G3	C2
TCGA-SU-A7E7	C2
TCGA-G9-6343	C1
TCGA-HC-7075	C1
TCGA-V1-A8WW	C1
TCGA-ZG-A9L6	C2
TCGA-HC-8213	C1
TCGA-HC-7231	C2
TCGA-YL-A9WH	C1
TCGA-XK-AAJR	C1
TCGA-EJ-5524	C2
TCGA-KK-A6E1	C1
TCGA-EJ-5522	C2
TCGA-WW-A8ZI	C1
TCGA-G9-6348	C2
TCGA-VP-A87C	C2
TCGA-EJ-5514	C2
TCGA-EJ-7786	C2
TCGA-CH-5746	C2
TCGA-HC-7209	C2
TCGA-J4-A83J	C1
TCGA-KK-A8IA	C1
TCGA-EJ-7797	C2
TCGA-KK-A7AW	C1
TCGA-2A-A8W3	C1
TCGA-EJ-7788	C1
TCGA-EJ-A65F	C1
TCGA-G9-6338	C1
TCGA-V1-A8X3	C1
TCGA-HC-A8CY	C1
TCGA-VN-A88I	C2
TCGA-ZG-A9LU	C2
TCGA-XJ-A83H	C2
TCGA-EJ-7330	C2
TCGA-J4-A83K	C2
TCGA-EJ-7783	C2
TCGA-EJ-7317	C2
TCGA-CH-5741	C1
TCGA-EJ-5498	C2
TCGA-ZG-A9LY	C2
TCGA-YL-A9WK	C1
TCGA-KK-A8ID	C1
TCGA-G9-6369	C1
TCGA-HC-7820	C2
TCGA-G9-6498	C1
TCGA-KK-A6E0	C1
TCGA-G9-7509	C2
TCGA-HC-7817	C2
TCGA-CH-5761	C1
TCGA-ZG-A8QZ	C2
TCGA-G9-6356	C2
TCGA-G9-6333	C2
TCGA-EJ-7794	C2
TCGA-ZG-A9LB	C1
TCGA-KC-A7FE	C2
TCGA-Y6-A9XI	C1
TCGA-EJ-A8FU	C2
TCGA-V1-A9ZR	C2
TCGA-J9-A52D	C1
TCGA-V1-A9Z9	C2
TCGA-HC-7211	C2
TCGA-V1-A9O7	C2
TCGA-YL-A8SQ	C1
TCGA-EJ-7791	C2
TCGA-EJ-7328	C2
TCGA-HC-A6HX	C2
TCGA-YL-A8SO	C1
TCGA-KC-A4BL	C2
TCGA-EJ-5497	C2
TCGA-YL-A8SH	C2
TCGA-HC-A76X	C1
TCGA-G9-6362	C1
TCGA-CH-5772	C1
TCGA-FC-A5OB	C1
TCGA-QU-A6IP	C2
TCGA-VN-A88R	C1
TCGA-J4-A6G1	C2
TCGA-QU-A6IN	C1
TCGA-EJ-7325	C1
TCGA-VN-A88L	C1
TCGA-EJ-5501	C2
TCGA-CH-5768	C2
TCGA-EJ-5494	C1
TCGA-HC-7737	C2
TCGA-KK-A8IJ	C1
TCGA-XJ-A9DX	C1
TCGA-HC-A9TH	C1
TCGA-CH-5765	C1
TCGA-KK-A6E5	C2
TCGA-EJ-5502	C2
TCGA-V1-A9Z8	C2
TCGA-KK-A7AV	C2
TCGA-EJ-5499	C2
TCGA-ZG-A9L1	C1
TCGA-CH-5769	C2
TCGA-G9-6378	C2
TCGA-FC-7708	C2
TCGA-KK-A6E3	C1
TCGA-EJ-A65E	C2
TCGA-EJ-7792	C2
TCGA-KK-A8I8	C1
TCGA-V1-A8WL	C2
TCGA-VN-A88O	C1
TCGA-HC-A6HY	C1
TCGA-KC-A4BR	C2
TCGA-YL-A9WJ	C2
TCGA-VN-A88N	C1
TCGA-HC-8261	C2
TCGA-J4-A67M	C2
TCGA-FC-A6HD	C1
TCGA-HC-A6AO	C1
TCGA-CH-5739	C1
TCGA-G9-6379	C2
TCGA-ZG-A9KY	C1
TCGA-G9-7523	C1
TCGA-CH-5771	C2
TCGA-V1-A9ZG	C1
TCGA-2A-A8VT	C2
TCGA-G9-6496	C1
TCGA-ZG-A8QX	C1
TCGA-EJ-5504	C1
TCGA-EJ-7123	C1
TCGA-HC-8258	C2
TCGA-EJ-A8FO	C2
TCGA-HC-7744	C2
TCGA-M7-A71Y	C2
TCGA-EJ-A6RA	C2
TCGA-EJ-5496	C2
TCGA-CH-5752	C1
TCGA-2A-A8VO	C1
TCGA-QU-A6IL	C1
TCGA-ZG-A9LS	C1
TCGA-G9-6329	C2
TCGA-KK-A7AY	C1
TCGA-CH-5762	C2
TCGA-KK-A7AU	C1
TCGA-YL-A9WI	C1
TCGA-XK-AAJT	C2
TCGA-EJ-A6RC	C2
TCGA-EJ-7784	C1
TCGA-FC-7961	C1
TCGA-EJ-A7NN	C1
TCGA-EJ-5506	C2
TCGA-EJ-7218	C1
TCGA-Y6-A8TL	C1
TCGA-VN-A88K	C1
TCGA-EJ-A65D	C1
TCGA-EJ-7327	C2
TCGA-KC-A7FD	C1
TCGA-EJ-A46F	C1
TCGA-M7-A723	C2
TCGA-XK-AAJ3	C1
TCGA-KK-A7AZ	C1
TCGA-HC-7742	C1
TCGA-X4-A8KQ	C2
TCGA-J9-A8CN	C1
TCGA-YL-A8SJ	C2
TCGA-HC-A8D0	C2
TCGA-TK-A8OK	C2
TCGA-EJ-A65B	C1
TCGA-CH-5764	C2
TCGA-VN-A88M	C1
TCGA-EJ-5503	C2
TCGA-HI-7171	C1
TCGA-G9-6342	C2
TCGA-V1-A8WV	C2
TCGA-YL-A9WY	C1
TCGA-EJ-5507	C2
TCGA-M7-A725	C1
TCGA-HC-7230	C1
TCGA-J4-A67R	C2
TCGA-J9-A8CP	C1
TCGA-KK-A8IB	C1
TCGA-CH-5767	C1
TCGA-EJ-5512	C2
TCGA-KK-A6E8	C1
TCGA-M7-A71Z	C1
TCGA-ZG-A9L9	C1
TCGA-G9-A9S0	C1
TCGA-EJ-A65G	C1
TCGA-YL-A8SR	C1
TCGA-HC-7748	C2
TCGA-2A-AAYU	C1
TCGA-2A-A8W1	C1
TCGA-FC-A4JI	C1
TCGA-HC-7210	C1
TCGA-G9-6336	C2
TCGA-KK-A6E2	C1
TCGA-KK-A5A1	C1
TCGA-EJ-A7NK	C2
TCGA-2A-AAYO	C1
TCGA-V1-A9ZI	C1
TCGA-G9-A9S4	C1
TCGA-VP-A872	C1
TCGA-KK-A7B0	C2
TCGA-J4-8198	C2
TCGA-HC-7819	C1
TCGA-HC-8259	C1
TCGA-EJ-5511	C1
TCGA-EJ-5495	C2
TCGA-ZG-A9L2	C1
TCGA-EJ-A7NJ	C2
TCGA-G9-6353	C2
TCGA-HC-7821	C1
TCGA-V1-A9OX	C2
TCGA-EJ-7782	C1
TCGA-V1-A8MG	C2
TCGA-XK-AAJP	C1
TCGA-EJ-A46I	C2
TCGA-G9-A9S7	C1
TCGA-HC-A76W	C2
TCGA-EJ-AB20	C2
TCGA-EJ-A7NM	C1
TCGA-VP-A87D	C1
TCGA-M7-A724	C1
TCGA-HC-7212	C1
TCGA-J4-A83N	C1
TCGA-CH-5790	C2
TCGA-EJ-AB27	C2
TCGA-XA-A8JR	C1
TCGA-EJ-5509	C2
TCGA-VN-A943	C1
TCGA-HC-7740	C2
TCGA-KK-A6E7	C1
TCGA-KK-A7B4	C1
TCGA-YL-A9WX	C2
TCGA-CH-5744	C1
TCGA-J4-AATZ	C1
TCGA-HC-8266	C2
TCGA-EJ-7781	C2
TCGA-KK-A8I9	C2
TCGA-YL-A8SA	C1
TCGA-HC-A6AN	C1
TCGA-HC-8262	C2
TCGA-EJ-A46B	C2
TCGA-KK-A59Y	C1
TCGA-EJ-8470	C2
TCGA-XK-AAIR	C2
TCGA-HC-7077	C1
TCGA-G9-6354	C1
TCGA-V1-A8WS	C2
TCGA-J4-A67Q	C1
TCGA-VN-A88Q	C1
TCGA-CH-5794	C2
TCGA-J4-A83L	C1
TCGA-G9-6351	C2
TCGA-VN-A88P	C1
TCGA-XK-AAJA	C1
TCGA-ZG-A9M4	C2
TCGA-HC-8264	C1
TCGA-H9-A6BX	C2
TCGA-V1-A8WN	C2
TCGA-KK-A8IL	C2
TCGA-J9-A8CK	C2
TCGA-TP-A8TV	C1
TCGA-J9-A52C	C2
TCGA-YL-A9WL	C1
TCGA-G9-6366	C1
TCGA-HC-7078	C2
TCGA-KK-A8I7	C2
TCGA-EJ-5510	C2
TCGA-KK-A7B2	C2
TCGA-EJ-A46E	C2
TCGA-G9-7521	C1
TCGA-V1-A9OQ	C1
TCGA-G9-6364	C1
TCGA-HC-A631	C2
TCGA-J4-A67L	C1
TCGA-EJ-5530	C1
TCGA-VP-A87K	C1
TCGA-QU-A6IO	C1
TCGA-VP-A879	C2
TCGA-V1-A9O5	C1
TCGA-VP-A878	C2
TCGA-4L-AA1F	C1
TCGA-KC-A7F6	C2
TCGA-KK-A8IK	C1
TCGA-XQ-A8TB	C1
TCGA-CH-5766	C2
TCGA-HC-A6AS	C1
TCGA-EJ-5531	C2
TCGA-EJ-7785	C2
TCGA-EJ-A46G	C1
TCGA-G9-6363	C1
TCGA-M7-A720	C2
TCGA-KK-A8I5	C1
TCGA-EJ-7793	C2
TCGA-HC-7752	C1
TCGA-XJ-A83F	C1
TCGA-EJ-5508	C2
TCGA-KK-A7AQ	C1
TCGA-XK-AAIV	C1
TCGA-EJ-7315	C1
TCGA-J4-A83I	C1
TCGA-EJ-7312	C1
TCGA-EJ-A7NH	C2
TCGA-CH-5737	C1
TCGA-J9-A8CM	C1
TCGA-G9-6332	C1
TCGA-HC-7079	C2
TCGA-HC-7818	C2
TCGA-EJ-8472	C2
TCGA-HC-7232	C2
TCGA-V1-A8MU	C2
TCGA-XJ-A83G	C1
TCGA-HC-8265	C2
TCGA-KC-A7F3	C2
TCGA-YL-A8SI	C1
TCGA-YL-A8SC	C1
TCGA-G9-6365	C2
TCGA-H9-A6BY	C1
TCGA-J4-A67S	C1
TCGA-VP-A87J	C1
TCGA-CH-5763	C2
TCGA-ZG-A9NI	C1
TCGA-KK-A6E4	C1
TCGA-EJ-A7NF	C1
TCGA-KC-A4BN	C2
TCGA-J4-A83M	C2
TCGA-EJ-5517	C1
TCGA-CH-5754	C1
TCGA-EJ-A46H	C2
TCGA-2A-AAYF	C1
TCGA-YL-A8HK	C1
TCGA-2A-A8VX	C1
TCGA-HC-A48F	C1
TCGA-FC-A66V	C2
TCGA-HC-7736	C2
TCGA-V1-A9O9	C2
TCGA-CH-5789	C2
TCGA-HC-A8D1	C2
TCGA-EJ-8468	C1
TCGA-V1-A9ZK	C2
TCGA-HC-8216	C2
TCGA-YL-A8SB	C2
TCGA-J4-AAU2	C1
TCGA-J9-A8CL	C1
TCGA-KK-A8I4	C2
TCGA-V1-A9OA	C2
TCGA-KK-A8IF	C1
TCGA-KK-A7B1	C2
TCGA-EJ-5527	C2
TCGA-ZG-A9LM	C2
TCGA-HC-7747	C2
TCGA-KK-A7B3	C1
TCGA-V1-A8ML	C1
TCGA-G9-6385	C2
TCGA-G9-6347	C1
TCGA-J4-A67T	C2
TCGA-ZG-A9L0	C1
TCGA-G9-6499	C2
TCGA-V1-A9OL	C1
TCGA-EJ-7789	C1
TCGA-ZG-A8QW	C2
TCGA-KK-A59X	C1
TCGA-M7-A721	C2
TCGA-EJ-7115	C2
TCGA-KK-A8IH	C1
TCGA-HI-7169	C1
TCGA-YL-A8HM	C1
TCGA-EJ-7318	C1
TCGA-MG-AAMC	C1
TCGA-YL-A8SL	C1
TCGA-G9-6361	C1
TCGA-KK-A8IM	C2
TCGA-EJ-A8FN	C1
TCGA-YL-A8SP	C1
TCGA-KC-A4BV	C1
TCGA-V1-A8MF	C1
TCGA-XJ-A9DQ	C2
TCGA-ZG-A9LN	C1
TCGA-KK-A6E6	C2
TCGA-CH-5748	C2
TCGA-CH-5743	C2
TCGA-KK-A8IC	C2
TCGA-KK-A59V	C1
TCGA-V1-A9OF	C2
TCGA-G9-7525	C1
TCGA-YJ-A8SW	C1
TCGA-KK-A6DY	C2
TCGA-HC-8257	C2
TCGA-EJ-7321	C2
TCGA-YL-A8HJ	C2
TCGA-KK-A59Z	C1
TCGA-HC-7749	C2
TCGA-HC-A6AP	C1
TCGA-QU-A6IM	C1
TCGA-EJ-7314	C2
TCGA-J4-AATV	C2
TCGA-H9-7775	C1
TCGA-EJ-A65J	C1
TCGA-XK-AAK1	C1
TCGA-YL-A8S9	C1
TCGA-J4-8200	C1
TCGA-ZG-A9L4	C1
TCGA-ZG-A8QY	C1
TCGA-YL-A8SK	C2
TCGA-ZG-A9ND	C1
TCGA-EJ-5542	C2
TCGA-EJ-5526	C2
TCGA-XQ-A8TA	C1
TCGA-ZG-A9LZ	C1
TCGA-KK-A8II	C1
TCGA-EJ-A7NG	C2
TCGA-HC-8260	C2
TCGA-KC-A7FA	C1
TCGA-VP-A875	C1
TCGA-HC-7081	C1
TCGA-CH-5745	C2
TCGA-HI-7168	C1
TCGA-HC-7738	C1
TCGA-V1-A9OH	C2
TCGA-HC-7745	C2
TCGA-V1-A8MM	C1
TCGA-EJ-A65M	C1
TCGA-FC-A8O0	C2
TCGA-YL-A8HO	C2
TCGA-ZG-A9N3	C1
TCGA-ZG-A9MC	C2
TCGA-CH-5792	C2
TCGA-J9-A52B	C2
TCGA-EJ-5519	C1
TCGA-XJ-A9DK	C2
TCGA-V1-A9Z7	C1
TCGA-HC-7750	C2
TCGA-HI-7170	C2
TCGA-G9-6494	C1
