# Supplementary material for: A novel defined risk signature based on pyroptosis-related genes can predict the prognosis of prostate cancer
Source: BMC Med Genomics. 2022 Feb 8;15:24. doi: 10.1186/s12920-022-01172-5 (PMC8822680; doi:10.1186/s12920-022-01172-5)
Supplement: Supplementary file 12 — Additional file 12: Table S6. Prognosis-related DEGs by univariate cox analysis (p < 0.05). [file 12920_2022_1172_MOESM12_ESM.csv]

id	HR	HR.95L	HR.95H	pvalue
EYA4	0.310238816	0.154652039	0.622352756	0.000983691
TP63	0.811431437	0.658848011	0.999351848	0.049291168
CENPA	2.452092787	1.814256043	3.314173353	5.37E-09
FRMD6	0.649888826	0.481731735	0.876744163	0.004787042
FAM124A	0.513151196	0.295263369	0.891828033	0.017984673
SLC15A1	0.466706281	0.27961642	0.778976974	0.003550206
MYBL2	1.850290427	1.491712445	2.29506342	2.16E-08
MSMB	0.841694518	0.767455687	0.923114745	0.000254084
GNG13	1.309118551	1.037875169	1.651250008	0.022978872
CBX2	2.033662451	1.510710705	2.737640601	2.86E-06
COL4A6	0.61407225	0.434801443	0.867257305	0.005630903
SPON1	0.750273871	0.585865862	0.96081871	0.022805353
CHRDL1	0.757760567	0.640936427	0.895878363	0.001166245
LCN2	0.824914021	0.740067004	0.919488558	0.000509536
PENK	0.682627622	0.481103481	0.968565992	0.032444973
PCDH7	0.625845434	0.443446281	0.883269348	0.007673822
ANO5	0.45004095	0.277219127	0.730602027	0.001239377
EDN3	0.441946826	0.26696745	0.731613524	0.001497956
CPNE7	1.226219582	1.018235214	1.476686765	0.031513802
COL27A1	1.457969253	1.017890042	2.088314313	0.039716322
SYNPO2	0.759564991	0.641716974	0.899055188	0.001388678
FAT4	0.569583007	0.330421603	0.981851064	0.04277625
COL7A1	1.462844507	1.153473052	1.855192064	0.001702737
TNS1	0.771013806	0.633869239	0.937831106	0.009261344
ARHGDIG	1.515018547	1.227468506	1.869930827	0.000109495
MAML2	0.64512644	0.459258231	0.906218104	0.0114743
SRD5A2	0.587158916	0.46395252	0.743083779	9.37E-06
RND2	0.501845619	0.289133438	0.871047732	0.014258176
LTF	0.926370077	0.858177814	0.999981014	0.049943139
CD177	0.866926734	0.777877483	0.966170095	0.009814228
KCTD14	0.568825139	0.392793998	0.823744863	0.002824094
FBXO17	0.668437716	0.456269188	0.97926617	0.03868681
COL17A1	0.811355001	0.660984281	0.995934332	0.045617131
ZNF750	0.73902852	0.561663995	0.972401931	0.030785302
ALDH1A2	0.563790422	0.410228059	0.774836418	0.000411772
NEK2	2.06168204	1.580604536	2.689181724	9.46E-08
ROR2	0.765330569	0.587073983	0.997712209	0.048053607
SPATA18	0.592867078	0.409591594	0.858150845	0.005593212
PROK1	0.587642697	0.452660176	0.762876783	6.53E-05
P2RX1	0.677535022	0.488916227	0.938920988	0.019358199
APOBEC3C	0.784374389	0.626782921	0.98158894	0.033808211
KIAA1210	0.634688262	0.46725292	0.862122361	0.003621266
ATP2B4	0.71596167	0.570299422	0.898828043	0.003988935
BIRC5	1.990495881	1.575584723	2.514668868	7.84E-09
FAM107A	0.634614788	0.503289434	0.8002074	0.000120989
COL23A1	0.560281885	0.354827341	0.88470012	0.012933858
MNX1	1.394172366	1.031945866	1.883545108	0.030401082
ALB	1.2857998	1.117918287	1.478892639	0.000429169
ACSS3	0.422669864	0.218640314	0.817094573	0.010449328
MPP2	0.611488731	0.390290484	0.958051715	0.031791295
OLFM4	0.888073639	0.806817901	0.977512754	0.015328616
GGT6	0.740809078	0.572811329	0.958078276	0.022234944
MR1	0.663507884	0.44752215	0.983733906	0.041192831
ITGA2	0.686667163	0.502409299	0.938501324	0.018367249
ARHGAP20	0.448399381	0.240802901	0.834965042	0.011452603
MYH11	0.783160301	0.684839586	0.895596677	0.000355715
ANGPT1	0.567993045	0.404836673	0.796904332	0.001060519
CCK	0.80596678	0.665051125	0.976740622	0.027808264
ACOX2	0.590464467	0.413267281	0.843638736	0.00380448
ATCAY	0.5000908	0.301957562	0.828231647	0.007099751
MEIS2	0.702006337	0.51521995	0.956509733	0.024982057
NEFH	0.915519296	0.841809863	0.995682777	0.039303913
SERPINB5	0.716807603	0.534502208	0.961292829	0.026174852
UBXN10	0.280230441	0.152346701	0.515463082	4.29E-05
SLC8A1	0.591411431	0.38404972	0.910734892	0.017105124
GNAL	0.534393766	0.338759847	0.843006334	0.007054436
PRIMA1	0.656433593	0.45313192	0.950948374	0.026018834
UBE2C	1.769873711	1.459874803	2.145699717	6.21E-09
MALAT1	1.270299081	1.06045286	1.521670425	0.009400971
ZNF185	0.647624843	0.501981933	0.835523969	0.000830266
SLC18A2	0.483491818	0.264471344	0.88389288	0.018229645
SLC26A4	0.766574511	0.63442239	0.926254322	0.005896615
MIR27B	1.340211123	1.023179154	1.75547542	0.033473477
CRIP3	0.508841083	0.268456317	0.964474409	0.03837428
PDZRN4	0.597206198	0.428985227	0.831392832	0.002258982
SLC2A5	0.720526727	0.545384544	0.951913233	0.02106619
SPZ1	1.411198011	1.096555249	1.816123562	0.007448371
PGM5	0.719240048	0.606383524	0.853100764	0.000154098
HES6	1.302476859	1.064078199	1.594286932	0.010403535
STAC	0.569289663	0.394977895	0.820528753	0.002523482
JPH4	0.584897867	0.434431792	0.787478082	0.000408497
SORBS1	0.754686614	0.619589021	0.919241411	0.005162848
AMH	1.888918483	1.51414431	2.35645507	1.73E-08
WFDC2	0.84487139	0.741105292	0.963166333	0.011692879
MYOCD	0.543135618	0.391014299	0.754438648	0.000272006
SCNN1A	0.805956181	0.673685209	0.964197161	0.018344784
MMP11	1.546842667	1.287103376	1.858997717	3.30E-06
TFF3	0.905814129	0.825242301	0.994252519	0.037412304
C2orf88	0.344900395	0.185957229	0.639697004	0.000731619
FOXI1	0.572314834	0.354788226	0.92321065	0.022169143
CLIC6	0.677242513	0.503263666	0.911366054	0.01009333
SYNM	0.747862592	0.632665874	0.884034495	0.000663634
B3GALT2	0.330650512	0.192155057	0.568966347	6.43E-05
SNAI2	0.758701192	0.598339719	0.962041263	0.022644125
TROAP	2.841629609	2.087989465	3.867289069	3.09E-11
IP6K3	0.410254223	0.252223431	0.667299334	0.000330971
TRPC4	0.56842568	0.360113366	0.897238992	0.015284538
MYLK	0.756509392	0.6381943	0.896758965	0.001301056
AOX1	0.65859059	0.510318588	0.849942714	0.001330602
FLNC	0.776708895	0.662201072	0.911017413	0.001901728
HPDL	0.399094581	0.206145381	0.772641539	0.006425504
GLIS1	0.666850017	0.446696596	0.995505562	0.047479442
FGF10	0.507136868	0.295163793	0.871339268	0.013944633
CA14	0.280443086	0.133913393	0.587307383	0.00074859
ZNF516	0.654881132	0.456311463	0.939860889	0.021650386
AHNAK2	0.644419039	0.443009455	0.93739737	0.021557838
PGR	0.501083044	0.269180257	0.932773523	0.029296711
GPX3	0.807640732	0.671775803	0.970983994	0.023008917
ADRA1A	0.415652642	0.233012314	0.741450594	0.00294882
FLNA	0.79322058	0.666767832	0.943655136	0.008935699
