# Supplementary material for: A novel defined risk signature based on pyroptosis-related genes can predict the prognosis of prostate cancer
Source: BMC Med Genomics. 2022 Feb 8;15:24. doi: 10.1186/s12920-022-01172-5 (PMC8822680; doi:10.1186/s12920-022-01172-5)
Supplement: Supplementary file 14 — Additional file 14: Table S8. High- and low-score groups based on risk score in GEO cohort. [file 12920_2022_1172_MOESM14_ESM.csv]

id	futime	fustat	CENPA	LCN2	COL7A1	ALB	UBXN10	SPZ1	SCNN1A	TFF3	PRG-score	group
GSM1817937	3.928767123	0	0.9255964	8.1666301	1.7185357	1.2492494	1.724718	0.8435911	2.5286545	9.7428466	-1.205636515	low-score
GSM1817921	2.838356164	1	1.1227558	4.632988	1.7198521	1.6692872	2.0197695	0.9598994	4.7100675	9.946262	-1.154345382	low-score
GSM1817951	7.706849315	0	1.226977	9.3977717	2.7885115	1.0263426	1.8090548	1.1406592	5.7524303	8.681676	-0.914389234	low-score
GSM1817979	6.619178082	0	1.3008991	7.1418486	2.3657715	1.288272	1.3273293	1.1410852	6.080618	9.6920832	-0.730881016	low-score
GSM1817932	7.561643836	0	1.399533	7.543924	2.6009609	1.508534	1.6511222	0.5005038	5.1620006	10.2933809	-0.723338484	low-score
GSM1817980	6.504109589	0	1.3504013	4.96832	1.3322602	1.5827739	1.1382596	1.3406877	4.5807873	8.9728002	-0.57052924	low-score
GSM1817940	0.150684932	0	1.0132938	6.9194632	2.2414162	1.3484722	2.0356384	1.3618839	4.7839014	5.0054902	-0.551386258	low-score
GSM1817945	8.194520548	0	1.64984126	5.32268957	2.44084059	1.33548372	1.56200589	0.01999403	5.59670581	9.75913882	-0.537178513	low-score
GSM1817971	7.024657534	0	1.0602983	5.2838612	1.9408872	1.4160703	1.5547215	0.5838542	3.9628083	6.7992731	-0.477730164	low-score
GSM1817995	5.77260274	0	1.1506087	10.149295	2.7204438	1.2732392	1.1405912	1.2936464	5.9364864	6.0782089	-0.370292473	low-score
GSM1817916	5.120547945	0	1.108764	8.8875961	2.442635	1.328454	1.4704318	0.5134096	4.0699801	4.9633675	-0.332166669	low-score
GSM1817994	5.060273973	0	1.4225515	4.1652944	2.0199925	1.5022091	1.9303852	1.2444807	3.6399723	9.9824016	-0.286536473	low-score
GSM1817926	8.175342466	0	1.5778098	4.406927	2.1601478	1.2065594	2.0095411	0.7602831	4.0953139	8.2706759	-0.264972289	low-score
GSM1817938	5.263013699	1	1.2367046	5.7660107	1.6108678	1.6814883	0.6989074	0.9175042	3.1159903	10.1798213	-0.177578155	low-score
GSM1817960	6.890410959	0	1.3420696	8.462991	3.1948044	1.1819434	1.9800079	1.0307181	3.7476091	9.4920982	-0.115800775	low-score
GSM1817934	7.679452055	0	1.3570032	3.8527526	1.9705228	1.4416637	1.4308872	0.4505061	4.1466558	7.0574637	-0.071778537	low-score
GSM1817924	8.356164384	0	1.2350136	4.5688175	2.0989952	1.4343673	1.1295433	0.5672222	3.3705225	9.4920982	-0.031704593	low-score
GSM1817936	8.071232877	0	1.2969823	5.9961809	2.5776071	1.3241622	1.3210599	0.9562491	4.2551764	9.5302033	-0.022056374	low-score
GSM1817954	7.024657534	0	1.0934682	6.1809266	2.1128241	2.1281813	0.84106	0.6275625	5.0914605	5.9345086	0.010942235	low-score
GSM1817956	3.046575342	1	1.1632569	4.8561618	2.0601206	1.3471433	1.1079707	1.1418978	3.1358204	9.6487973	0.048673493	low-score
GSM1817942	5.5	0	1.5428269	6.7253182	2.1456337	2.2858996	2.296818	1.4423046	4.3450291	4.1512367	0.057718163	low-score
GSM1817952	5.194520548	0	1.347644	5.7828227	2.7898413	1.2408072	1.9821607	1.0767407	4.4683059	6.678029	0.097108889	low-score
GSM1817976	0.071232877	1	1.6958569	2.8269015	1.9049324	1.8160677	1.5234107	0.9840946	4.2898966	9.9533089	0.098040202	low-score
GSM1817966	6.564383562	0	2.1887682	2.8931556	1.6335411	1.3294807	1.9057667	1.1305504	3.6391117	9.8210522	0.102132447	low-score
GSM1817970	6.873972603	0	0.9186481	5.0380856	3.1009959	1.1794609	1.7846317	0.7203875	3.9962624	7.4248328	0.152077486	low-score
GSM1817984	0.126027397	1	1.8860617	2.765601	2.3992637	0.9831696	1.6639475	0.7435664	4.9139299	9.829206	0.172499449	low-score
GSM1817959	3.915068493	0	1.5082505	6.0269658	2.45817	1.0789005	0.6066276	0.6368117	4.6477391	9.8600595	0.193739372	low-score
GSM1817931	1.361643836	1	1.447957	5.4792208	2.1807731	1.7838161	1.2227419	0.7908595	3.8687806	7.5562764	0.259714884	low-score
GSM1817985	6.194520548	0	1.3167195	7.8594079	3.3590023	1.1617586	1.7241845	1.2530245	5.6702671	5.6427403	0.287524794	low-score
GSM1817975	6.649315068	0	1.6573463	4.7847135	3.0552109	1.2718505	1.285549	1.2741052	6.7512148	9.8122961	0.298476206	low-score
GSM1817953	6.98630137	0	1.3036823	3.2577257	2.915118	0.962597	1.8849718	1.5374341	4.392185	9.8525316	0.304929808	low-score
GSM1817958	7.016438356	0	1.4175764	2.3226784	1.6632765	1.3378859	1.6326259	0.7440625	3.2204965	4.6440971	0.352401222	low-score
GSM1817969	7.005479452	0	1.5560417	2.4049881	2.093952	1.2313401	1.7928282	0.8491198	2.6972211	8.8186025	0.355140411	low-score
GSM1817968	3.049315068	1	1.32035258	3.48569831	3.25419612	0.87171345	2.36067639	1.13452868	5.65239655	4.9357618	0.386334849	low-score
GSM1817987	5.843835616	0	1.3444792	5.1806262	3.1803953	1.1623018	1.934718	0.8863403	4.9811493	5.9726199	0.404578297	low-score
GSM1817967	6.438356164	0	1.050178	3.146834	2.2099451	1.6891734	1.4893448	0.8941588	3.3764612	5.6283388	0.474211937	low-score
GSM1817907	1.608219178	1	1.6005689	7.4932143	3.9687011	1.3835035	1.7386776	0.3365686	5.7513153	8.3151446	0.484487655	low-score
GSM1817927	4.753424658	0	1.2162461	4.2698327	3.5236634	1.5437121	1.3250426	0.7611804	5.8539278	9.8881579	0.492936269	low-score
GSM1817944	1.975342466	1	2.2816221	7.8437883	2.7246256	1.3174552	1.6969279	0.6486812	4.128977	7.4966316	0.508610946	low-score
GSM1817983	0.520547945	1	1.7166031	3.6652183	2.6333454	2.9242418	1.7126516	1.0796345	5.2841637	9.9752559	0.516561914	low-score
GSM1817986	0.084931507	1	1.4915257	3.3068719	2.2403311	1.8702887	1.2016974	0.8802894	3.62173	9.5396675	0.525825525	low-score
GSM1817946	7.991780822	0	1.3395712	4.083334	2.6734753	1.3736959	1.4879619	0.6785109	4.4058052	5.7507788	0.553342489	low-score
GSM1817993	3.167123288	1	1.2398085	4.1312525	3.3063071	1.3525135	1.9018749	0.8616791	4.8608738	6.399879	0.603305032	low-score
GSM1817914	0.298630137	1	1.7134084	3.7963064	2.4392891	1.2196628	1.5270135	0.8935803	3.7684056	6.9441098	0.700164323	low-score
GSM1817964	7.632876712	0	1.5134381	3.552041	2.6042967	1.5243112	1.0782875	0.8249031	4.6920122	8.0001866	0.710785057	low-score
GSM1817998	5.046575342	0	2.011643	3.5793091	2.3165181	1.1114653	1.2346738	0.9401607	3.7158741	9.560289	0.74167487	low-score
GSM1817982	3.567123288	1	1.6185511	2.8214269	1.9502686	1.0200758	1.2260113	1.0724343	3.1597568	6.4117129	0.758890745	low-score
GSM1817981	3.539726027	1	1.3972911	4.2074079	2.569186	2.0316623	1.3618773	0.7968396	3.2460589	8.0559673	0.761948915	low-score
GSM1817923	8.619178082	0	1.2589698	3.9027299	2.6391455	1.2647346	2.0393284	0.474796	3.0087599	2.1321969	0.787032302	low-score
GSM1817922	0.131506849	1	1.8934919	4.2249768	3.0078817	1.0034167	1.8106487	1.0799635	5.776273	4.6479427	0.866527897	low-score
GSM1817992	5.8	0	1.4512776	5.1636935	3.0933351	1.0463724	1.6474378	1.1955388	4.0744319	5.9493755	0.867450133	low-score
GSM1817933	4.394520548	0	1.9275692	2.9096379	2.4365385	1.5676375	1.3358769	0.9999846	3.5388352	10.07267	0.90628518	high-score
GSM1817962	5.580821918	1	1.5858298	2.5773901	2.5103727	1.6229921	1.7653316	1.1197688	3.4783533	6.7876525	0.921655035	high-score
GSM1817973	7.128767123	0	1.630709	2.3887322	2.8613463	1.4409634	1.9108734	0.9468374	3.2361561	8.6488333	0.928643051	high-score
GSM1817929	2.238356164	1	1.6543543	2.7564203	2.7850733	1.0893249	1.7351533	0.7670178	4.9016125	3.5416704	0.999379541	high-score
GSM1817913	0.635616438	1	1.1439865	1.6308625	2.0854841	3.1956673	1.9190864	1.1939322	1.2865265	8.077653	1.012418632	high-score
GSM1817943	7.282191781	0	1.1827752	5.0600346	3.2434941	2.4867529	1.0764614	0.9468374	4.2402951	8.9929182	1.020275732	high-score
GSM1817935	6.468493151	0	1.4272593	5.7222694	3.5052628	1.6707243	1.7246464	0.5062667	3.1745061	7.3129857	1.041440544	high-score
GSM1817950	6.879452055	0	1.3753301	2.7621887	2.5147194	1.18875	1.1992251	1.4884653	4.7072491	4.7079224	1.056558055	high-score
GSM1817991	2.484931507	1	1.3017182	5.1355068	3.2267474	2.2193801	1.7018001	0.7073226	4.4121349	4.2394073	1.060353604	high-score
GSM1817955	2.501369863	1	1.2770075	5.0112006	3.7206161	1.4112309	1.4646218	0.9363019	4.5325319	7.7749663	1.069426924	high-score
GSM1817920	1.578082192	0	1.1639042	1.7621187	2.8997732	1.6237722	1.8438728	1.0200945	4.0915255	4.2120702	1.099414692	high-score
GSM1817911	0.673972603	1	1.6542581	6.0150167	3.2206178	0.9417157	1.0213453	0.8156606	4.8508654	5.6748305	1.104045612	high-score
GSM1817930	2.410958904	1	1.4995968	5.1552323	2.5190691	1.7026461	1.5936154	0.6979513	2.8233352	2.7886077	1.106924307	high-score
GSM1817978	0.117808219	1	1.3609944	6.1482115	3.6399133	1.537287	1.9636218	1.0762339	3.6440337	5.5017675	1.134446187	high-score
GSM1817909	5.128767123	1	1.3746387	4.2669749	2.9122194	1.4355552	2.020087	1.4111205	3.1382256	3.7979888	1.161077206	high-score
GSM1817939	6.868493151	0	1.1252747	3.251716	3.4573604	0.9396632	1.541972	1.0488925	4.1841183	5.4979411	1.195603179	high-score
GSM1817996	0.131506849	1	1.3812986	1.9790404	2.9048144	1.2434243	1.5751919	0.8202148	3.572899	4.9765541	1.287444425	high-score
GSM1817919	8.189041096	1	1.4253427	4.9417688	3.5211526	1.1650662	1.5104274	1.3712407	4.7698309	5.1348815	1.31662152	high-score
GSM1817947	7.882191781	0	1.6052534	7.0395956	3.9805516	1.2320256	1.7422584	1.8344226	3.5486553	9.569735	1.335531689	high-score
GSM1817910	0.843835616	1	1.2845063	2.926168	3.1052581	1.7065822	1.6166426	0.7994727	3.0440014	3.4330467	1.612223169	high-score
GSM1817948	3.476712329	1	1.1572682	3.305429	3.7386612	1.4284156	1.6087257	1.1086195	3.698727	5.4500695	1.639034464	high-score
GSM1817917	1.526027397	1	1.3644232	2.6469814	2.9132512	1.8015027	0.6481188	1.1577494	4.7480541	5.4393528	1.665414555	high-score
GSM1817957	1.915068493	1	1.5189449	2.1745152	3.0311755	1.3124223	1.2130872	0.8824173	3.4260931	4.7167577	1.78173723	high-score
GSM1817972	3.057534247	1	1.446117	2.8821722	3.5135464	1.0375026	1.0608121	1.3890282	3.2890706	7.0942629	1.97186034	high-score
GSM1817990	5.353424658	1	1.4496736	2.9529888	4.60122	1.3654058	1.4189309	0.8365162	5.6635892	7.0856418	1.986745221	high-score
GSM1817912	2.01369863	1	1.3671569	9.1643516	5.4907106	1.6396144	1.4801019	0.8283716	5.137865	6.5373884	2.007945043	high-score
GSM1817974	5.098630137	0	1.5089378	3.0622228	2.8609888	5.2130775	1.3737236	1.3298878	2.4808124	10.0880246	2.040340851	high-score
GSM1817906	1.002739726	1	2.0211608	2.5223246	3.4439608	1.1488663	1.6192506	0.7869689	3.6698784	4.9058393	2.049104719	high-score
GSM1817941	0.150684932	1	1.7657306	3.2113809	2.985367	1.5233481	1.3314447	1.5639332	3.6628719	3.1398673	2.090658314	high-score
GSM1817989	5.712328767	0	1.5238325	2.7917622	4.1823637	1.2905351	1.83174	1.028651	2.8097173	6.6530257	2.21281775	high-score
GSM1817997	4.906849315	0	2.197805	3.3945662	2.3667715	9.5207302	1.3055393	0.7331644	5.4875244	10.1275632	2.240663603	high-score
GSM1817908	0.030136986	1	2.4698431	1.9896497	3.1109747	1.0704492	1.2304778	0.5779348	3.5591696	5.1411425	2.341528644	high-score
GSM1817915	0.243835616	1	1.5673818	2.6588793	4.0461636	1.3450759	1.728438	1.4163076	4.1013143	3.363855	2.417761609	high-score
GSM1817999	0.112328767	1	2.8062776	2.2938398	3.8569937	1.4399455	1.0131916	0.8929701	6.8280118	6.6461841	2.548998997	high-score
GSM1817963	6.391780822	0	1.7502665	1.9408622	4.011149	1.4022718	1.5573196	0.9966536	2.5000291	6.1315202	2.668036863	high-score
GSM1817925	0.117808219	1	1.9125578	3.3842886	3.9599936	3.6542314	1.231309	0.8218822	2.9171993	9.225466	2.761743863	high-score
GSM1817949	0.147945205	1	4.1387151	3.8875964	2.6354441	1.417041	1.5829265	1.5245324	4.9605327	4.0526902	2.892993326	high-score
GSM1817965	1.657534247	1	2.3764132	1.6978878	3.1384498	1.6429165	1.7543085	1.0200945	1.6907432	3.292982	2.903790064	high-score
GSM1817988	1.536986301	1	3.4131381	3.1553529	3.763596	1.5548803	1.2386748	0.840085	4.2351696	6.678029	3.265374786	high-score
GSM1817977	3.967123288	1	1.6932777	3.0833411	5.1070061	2.4230096	1.6953288	1.6382783	3.6600455	7.4531853	3.277753674	high-score
GSM1817918	0.115068493	1	2.7101388	1.2462709	3.2881688	1.2105095	1.0949289	0.4981589	1.7168815	5.0085845	3.283909416	high-score
